# Supplementary material for: Sarcopenia in male patients with head and neck cancer receiving chemoradiotherapy: a longitudinal pilot study
Source: PeerJ. 2020 Feb 26;8:e8617. doi: 10.7717/peerj.8617 (PMC7049254; doi:10.7717/peerj.8617)
Supplement: Supplemental Information 1 [file peerj-08-8617-s001.xlsx]

## Sheet: Sheet1
Gender	Occupation	BaseTUG	BaseDis	BaseSkel	BaseGripstrength	BaseSARC-F	3weekTUG	3weekDis	3weekSkel	3weekGripstrength	3weekSARC-F	7weekTUG	7weekDis	7weekSkel	7weekGripstrength	7weekSARC-F
male	labour worker	9.92	6	24.1	24	4	8.7	6	23.8	23	4	10.2	6	20.5	21	5
male	agriculturist	8.57	6	30.9	38	0	7.83	6	31.6	40	0	7.42	6	34	39	0
male	labour worker	8.54	6	31.6	18	1	8.72	6	31.8	18	2	9.2	6	30.08	16	5
male	agriculturist	5.86	6	32.8	36	0	5.02	6	32.1	28	1	6.72	6	30.2	23	4
male	mechanic	12	6	28.1	23	3	12.5	6	26.7	20	5	14.2	6	25.2	18	6
male	labour worker	7.7	6	30.3	20	3	12.3	6	29.3	18	5	14.4	6	26.8	17	5
male	labour worker	10.86	6	26.2	28	4	13.8	6	25.8	26	5	14.3	6	25.1	22	5
male	tailor	9.63	6	33.8	20	3	10.5	6	31.4	18	3	11.2	6	28.2	18	5
male	labour worker	9.08	6	29.3	23	3	11.5	6	28.7	20	5	14.7	6	23.7	17	6
male	agriculturist	13.7	6	25.3	17	3	14.1	6	24.8	15	4	15.8	6	21.6	13	6
male	labour worker	14.3	6	25.5	22	5	15.1	6	23.2	17	5	14.9	6	20.6	16	6
male	labour worker	14.3	6	29.1	28	5	14.1	6	27.2	25	5	14.8	6	22.3	20	5
male	labour worker	13.8	6	29	29	5	14.2	6	26.6	20	5	14.8	6	23.9	17	5
male	labour worker	13.9	6	29.7	29	3	14.5	6	26.2	26	5	14.7	6	24.1	21	6
male	labour worker	6.9	6	34.3	20	2	7.5	6	34.1	18	3	7.8	6	30.2	17	5
male	priest	7.9	6	28.8	30	1	8.2	6	27.2	28	2	8	6	28.5	25	3
male	labour worker	9.5	6	33.2	27	2	11.2	6	31.1	23	3	12.4	6	29.8	19	4
male	labour worker	6.7	6	32.2	29	1	8.2	6	31.5	27	3	11.2	6	28.5	22	4
male	labour worker	8.2	6	33.7	35	1	9.8	6	33.1	33	4	13.4	6	29.2	27	5
